# Supplementary material
Source: publisher site journal article supplement (https://static.cambridge.org/content/id/urn:cambridge.org:id:article:S0890037X20001347/resource/name/S0890037X20001347supp001.docx)
Supplement: Supplementary file 1 [file S0890037X20001347supp001.docx]

# Supplemental Material

**Table S1**. Seed production estimates of annual sowthistle at the KYP site in 2018 under each of the herbicide treatments. Counts were taken approximately 12 weeks after herbicide treatment, shortly before crop harvest. Means within a column followed by the same letter are not significantly different at *P*=0.05.

| Herbicide treatment | Seed production |
| --- | --- |
|  | seeds m-2 |
| Proactive | 69 a |
| Conventional | 611 b |
| Nontreated | 1,193 c |

**Table S2**. Density of annual sowthistle and prickly lettuce at the RS2 trial site prior to sowing at the beginning of the 2019 growing season. Counts have been averaged across the whole site area because there were no significant treatment differences, and values are expressed as mean plant density with standard error in parentheses.

|  | Weed density |
| --- | --- |
|  | plants m-2 |
| Annual sowthistle | 9.5 (1.3) |
| Prickly lettuce | 1.9 (0.48) |
